# Supplementary material for: Spontaneous Regression of Hepatocellular Carcinoma and Review of Reports in the Published English Literature
Source: Case Rep Med. 2019 Mar 31;2019:9756758. doi: 10.1155/2019/9756758 (PMC6462316; doi:10.1155/2019/9756758)
Supplement: Supplementary Materials — Table S1: patient's clinical history organized as a timeline. Table S2: characteristics of patients with spontaneous regression (SR) of HCC. Table S3: resected cases of HCC that regressed spontaneously, with radiographic and pathologic features that demonstrate vascular insufficiency and/or an inflammatory response. [file 9756758.f1.zip]

Archive with 3 entries (3 files):
- table s1.docx
- table s2-characteristics of patients with spontaneous regression_CRIM_2680984.docx
- table s3-resected cases of hcc that regressed spontaneously_CRIM_2680985.docx
